# Supplementary material for: WO3 Nanoplates Decorated with Au and SnO2 Nanoparticles for Real-Time Detection of Foodborne Pathogens
Source: MDPI journal article supplement (doi:10.3390/nano14080719), 2024-04-19
Supplement: s1 [file s1]

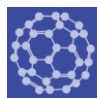

# WO<sub>3</sub> Nanoplates decorated with Au and SnO<sub>2</sub> nanoparticles for Real Time Detection of Foodborne Pathogens

Xueyan Li <sup>1</sup>, Zeyi Wu <sup>1</sup>, Xiangyu Song <sup>1</sup>, Denghua Li <sup>2,\*</sup>, Jiajia Liu <sup>1,\*</sup> and Jiatao Zhang <sup>1,3,4</sup>

<sup>1</sup> School of Materials Science and Engineering, Beijing Key Laboratory of Construction-Tailorable Advanced Functional Materials and Green Applications, Beijing Institute of Technology, Beijing 100081, China; zhangjt@bit.edu.cn (J.Z.)

<sup>2</sup> Key Laboratory of Agricultural Information Service Technology of Ministry of Agriculture, Agricultural Information Institute of Chinese Academy of Agricultural Sciences, Beijing 100081, China

<sup>3</sup> School of Chemistry and Chemical Engineering, MIT Key Laboratory of Medical Molecule Science and Pharmaceutical Engineering, Beijing Institute of Technology, Beijing 100081, China

<sup>4</sup> MOE Key Laboratory of Cluster Science, Beijing Institute of Technology, Beijing 100081, China

\* Correspondence: lidenghua@caas.cn (D.L.); liujiajia@bit.edu.cn (J.L.)

## Chemicals and Materials:

Sodium tungstate (Na<sub>2</sub>WO<sub>4</sub>·2H<sub>2</sub>O, 98%) was purchased from Shanghai Adamas Reagent Co., LTD. L(+)-Lactic acid (C<sub>3</sub>H<sub>6</sub>O<sub>3</sub>, 99%), Chloroauric acid (HAuCl<sub>4</sub>, 99%), 3-hydroxy-2-butanone (C<sub>4</sub>H<sub>8</sub>O<sub>2</sub>, 98%) were purchased from Shanghai Aladdin Biochemical Technology Co., LTD. Hydrochloric acid (HCl, 36% ~ 37%, w/w) was purchased from Sinopharm Group Chemical reagent Co., LTD. Stannous chloride (SnCl<sub>2</sub>, 99%) was purchased from Beijing Tongguang Fine Chemical Company. All reagents were used without any further purification.

## Characterizations.

The morphology of the samples was analyzed using field emission scanning electron microscopy (FESEM, Regulus8230). Low-resolution transmission electron microscopy (TEM) images were acquired on a HITACHI H-7650 (accelerating voltage of 80 kV) electron microscopy. High-resolution transmission electron microscopy (HRTEM) characterization and energy dispersive X-ray spectroscopy (EDS) analysis were operated on a transmission electron microscopy (FEI Tecnai G2 F20 S-Twin, an acceleration voltage of 200 kV) equipped with X-ray energy-dispersive spectroscopy detector. The XRD patterns were obtained by using a Bruker D8 multiply crystals X-ray diffractometer with Cu K $\alpha$  radiation (5 °·min<sup>-1</sup>). The XPS spectra were recorded on a PerkinElmer Physics PHI 5300 spectrometer using mono-chromatic Al K $\alpha$  radiation (1486.7 eV). Optical absorption spectra were recorded using Shimadzu UV3600 spectrophotometer. Ultraviolet photoelectron spectrometer (UPS) was taken on a Thermo ESCALAB 250Xi spectrometer, where the HeI energy of the excitation source is 21.22 eV, and the bias voltage of -10 eV is added during the test. Electron Paramagnetic Resonance (EPR) spectra were obtained on a Bruker A300-10/12 electron paramagnetic resonance spectrometer.

## Gas-Sensing Measurement.

The obtained sample was mixed with a certain amount of deionized water to form a paste. Then, the paste was applied to the surface of a ceramic tube, which equipped with Pt-Au electrodes and a Ni-Cr alloy wire as a heater. Finally, the six wires of the ceramic tube were welded onto base and aged at 260 °C for three days. A gas response instrument (WS-30B, Weisheng Ltd., Zhengzhou, China) was used to measure the gas-sensing characteristics with static gas distribution method. For volatile organic compounds detection, a certain volume of liquid was injected into the test chamber on a heating platform. The NO<sub>2</sub> concentration in the 18 L sensing chamber was controlled by injecting certain

volumes of 1800 ppm NO<sub>2</sub> diffusing in N<sub>2</sub> with a syringe. When the gas sensor resistance was stable, the lid was removed, and the mixed gas diffused away. The resistance ratio between the gas sensor in air ( $R_a$ ) and target gas ( $R_g$ ) was calculated as the gas response, where  $R_g/R_a$  and  $R_a/R_g$  were for oxidizing gas and reducing gases, respectively. The response/recovery time is defined as the time for the variation in gas response to reach 90% of the equilibrium value after a test gas was injected or released.

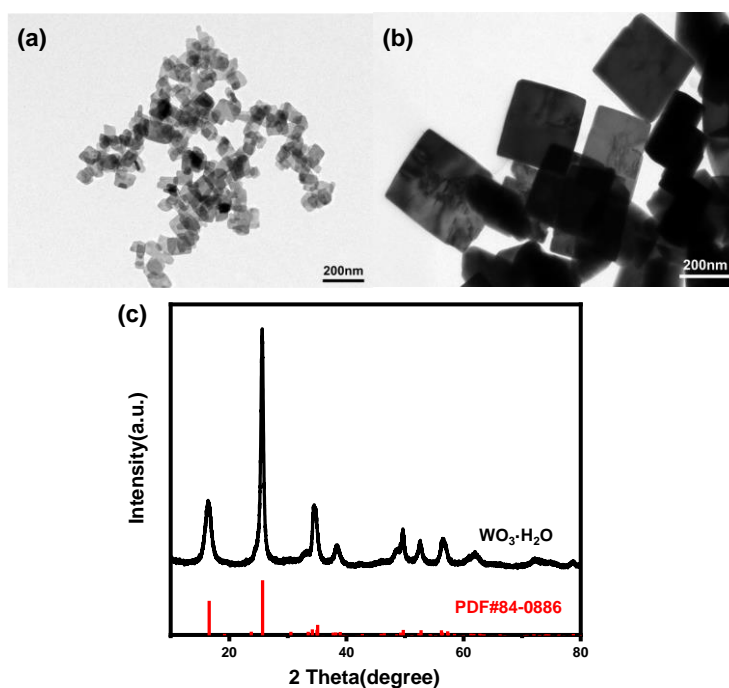

**Figure S1.** (a, b) TEM images of pre-hydrothermal products and WO<sub>3</sub>·H<sub>2</sub>O nanosheets; (c) The XRD patterns of WO<sub>3</sub>·H<sub>2</sub>O nanosheets.

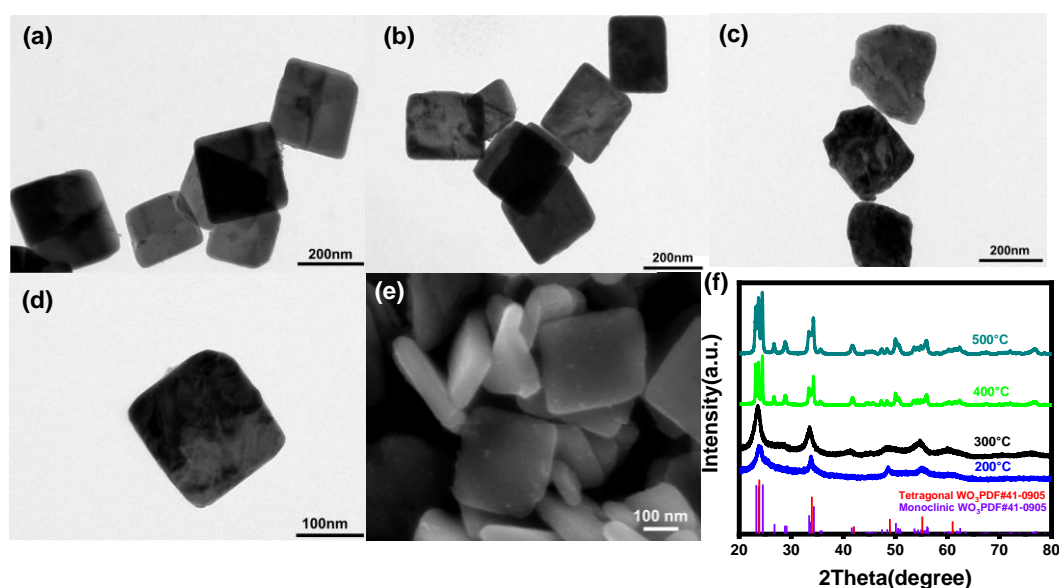

**Figure S2.** (a) TEM image of WO<sub>3</sub> nanoplates after 200°C calcination ; (b) TEM image of WO<sub>3</sub> nanoplates after 300°C calcination ; (c) TEM image of WO<sub>3</sub> nanoplates after 500°C calcination ; (d-e) TEM and SEM images of WO<sub>3</sub> nanoplates after 400°C calcination; (f) The XRD patterns of WO<sub>3</sub> nanoplates after 200°C, 300°C, 400°C and 500°C calcination.

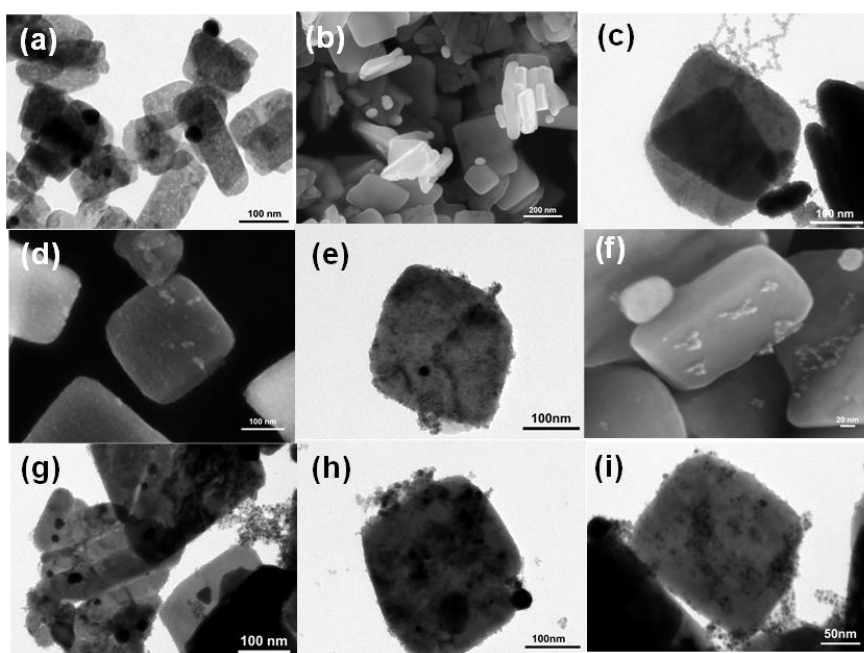

**Figure S3.** (a-b) The TEM and SEM images of Au-WO<sub>3</sub> nanoplates; (c-d) The TEM and SEM images of SnO<sub>2</sub>-WO<sub>3</sub> nanoplates; (e-f) The TEM and SEM images of 1Au/SnO<sub>2</sub>-WO<sub>3</sub> nanoplates; (g) The TEM images of 0.5Au/SnO<sub>2</sub>-WO<sub>3</sub> nanoplates; (h) The TEM images of 0.75Au/SnO<sub>2</sub>-WO<sub>3</sub> nanoplates; (i) The TEM images of 1.25Au/SnO<sub>2</sub>-WO<sub>3</sub> nanoplates.

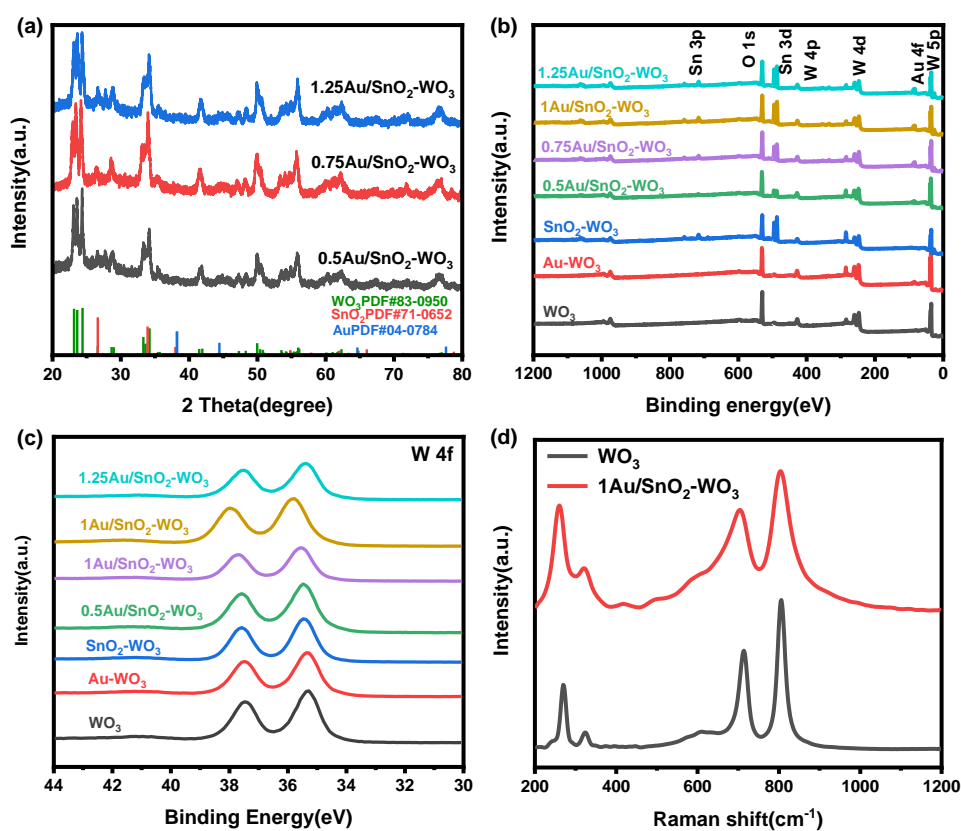

**Figure S4.** (a) The XRD patterns of XAu/SnO<sub>2</sub>-WO<sub>3</sub> nanoplates; (b) The survey XPS patterns of WO<sub>3</sub> nanoplate-based and XAu/SnO<sub>2</sub>-WO<sub>3</sub> nanoplate-based sensors; (c) XPS spectra of W 4f; (d) Raman spectra of WO<sub>3</sub> nanoplates and 1Au/SnO<sub>2</sub>-WO<sub>3</sub> nanoplates.

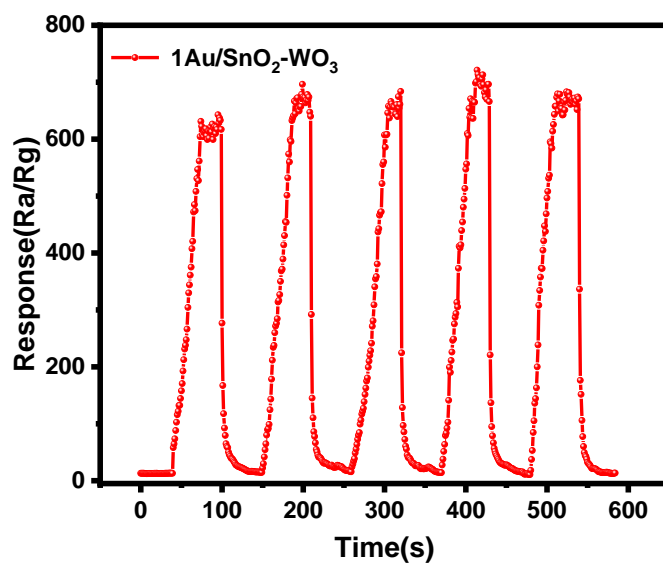

**Figure S5.** Dynamic sensing response of the sensor based on 1Au/SnO<sub>2</sub>-WO<sub>3</sub> nanoplates to 25 ppm 3H-2B at 140°C.

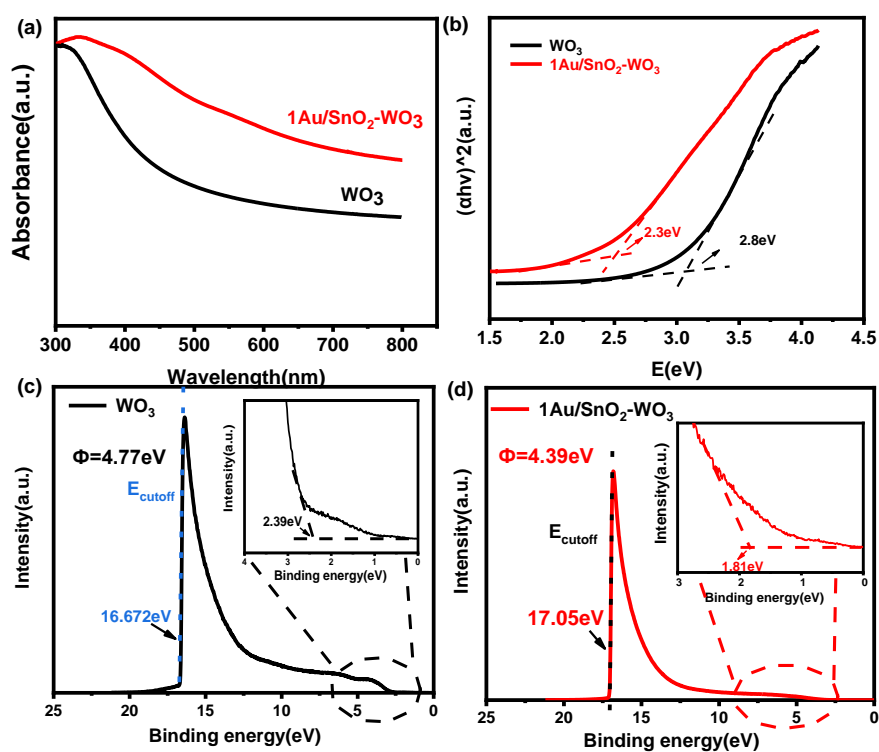

**Figure S6.** (a) UV-vis absorption spectra, (b) Tauc Plot of WO<sub>3</sub> nanoplates and 1Au/SnO<sub>2</sub>-WO<sub>3</sub> nanoplates; UPS spectra of (c) WO<sub>3</sub> nanoplates and (d) 1Au/SnO<sub>2</sub>-WO<sub>3</sub> nanoplates.

**Table S1.** Samples prepared in this work.

| Sample                                   | Preparation method           | Materials in deposition         |                                |
|------------------------------------------|------------------------------|---------------------------------|--------------------------------|
|                                          |                              | HAuCl <sub>4</sub><br>(5 mg/mL) | SnCl <sub>2</sub><br>(5 mg/mL) |
| WO <sub>3</sub>                          | Hydrothermal and calcination | -                               | -                              |
| Au-WO <sub>3</sub>                       | Photochemical deposition     | 1 mL                            | -                              |
| SnO <sub>2</sub> -WO <sub>3</sub>        | Photochemical deposition     | -                               | 1 mL (+2g KIO <sub>3</sub> )   |
| 0.5Au/SnO <sub>2</sub> -WO <sub>3</sub>  | Photochemical deposition     | 0.5 mL                          | 0.5 mL                         |
| 0.75Au/SnO <sub>2</sub> -WO <sub>3</sub> | Photochemical deposition     | 0.75 mL                         | 0.75 mL                        |
| 1Au/SnO <sub>2</sub> -WO <sub>3</sub>    | Photochemical deposition     | 1 mL                            | 1 mL                           |
| 1.25Au/SnO <sub>2</sub> -WO <sub>3</sub> | Photochemical deposition     | 1.25 mL                         | 1.25 mL                        |

**Table S2.** The mass percentage of Au and Sn elements in XAu/SnO<sub>2</sub>-WO<sub>3</sub> nanoplates.

| Sample                                   | Au(wt%) | Sn(wt%) |
|------------------------------------------|---------|---------|
| Au-WO <sub>3</sub>                       | 1.95    | -       |
| SnO <sub>2</sub> -WO <sub>3</sub>        | -       | 19.56   |
| 0.5Au/SnO <sub>2</sub> -WO <sub>3</sub>  | 5.21    | 10.34   |
| 0.75Au/SnO <sub>2</sub> -WO <sub>3</sub> | 5.43    | 14.57   |
| 1Au/SnO <sub>2</sub> -WO <sub>3</sub>    | 5.71    | 19.42   |
| 1.25Au/SnO <sub>2</sub> -WO <sub>3</sub> | 6.61    | 19.55   |
